# Supplementary material for: Cervicovaginal-Microbiome Analysis by 16S Sequencing and Real-Time PCR in Patients from Novosibirsk (Russia) with Cervical Lesions and Several Years after Cancer Treatment
Source: MDPI journal article supplement (doi:10.3390/diagnostics13010140), 2023-01-01
Supplement: s1 [file s1]

## Supplementary Materials

# Cervicovaginal-microbiome analysis by 16S sequencing and real-time PCR in patients from Novosibirsk (Russia) with cervical lesions and several years after cancer treatment

Ivanov M.K. et al.

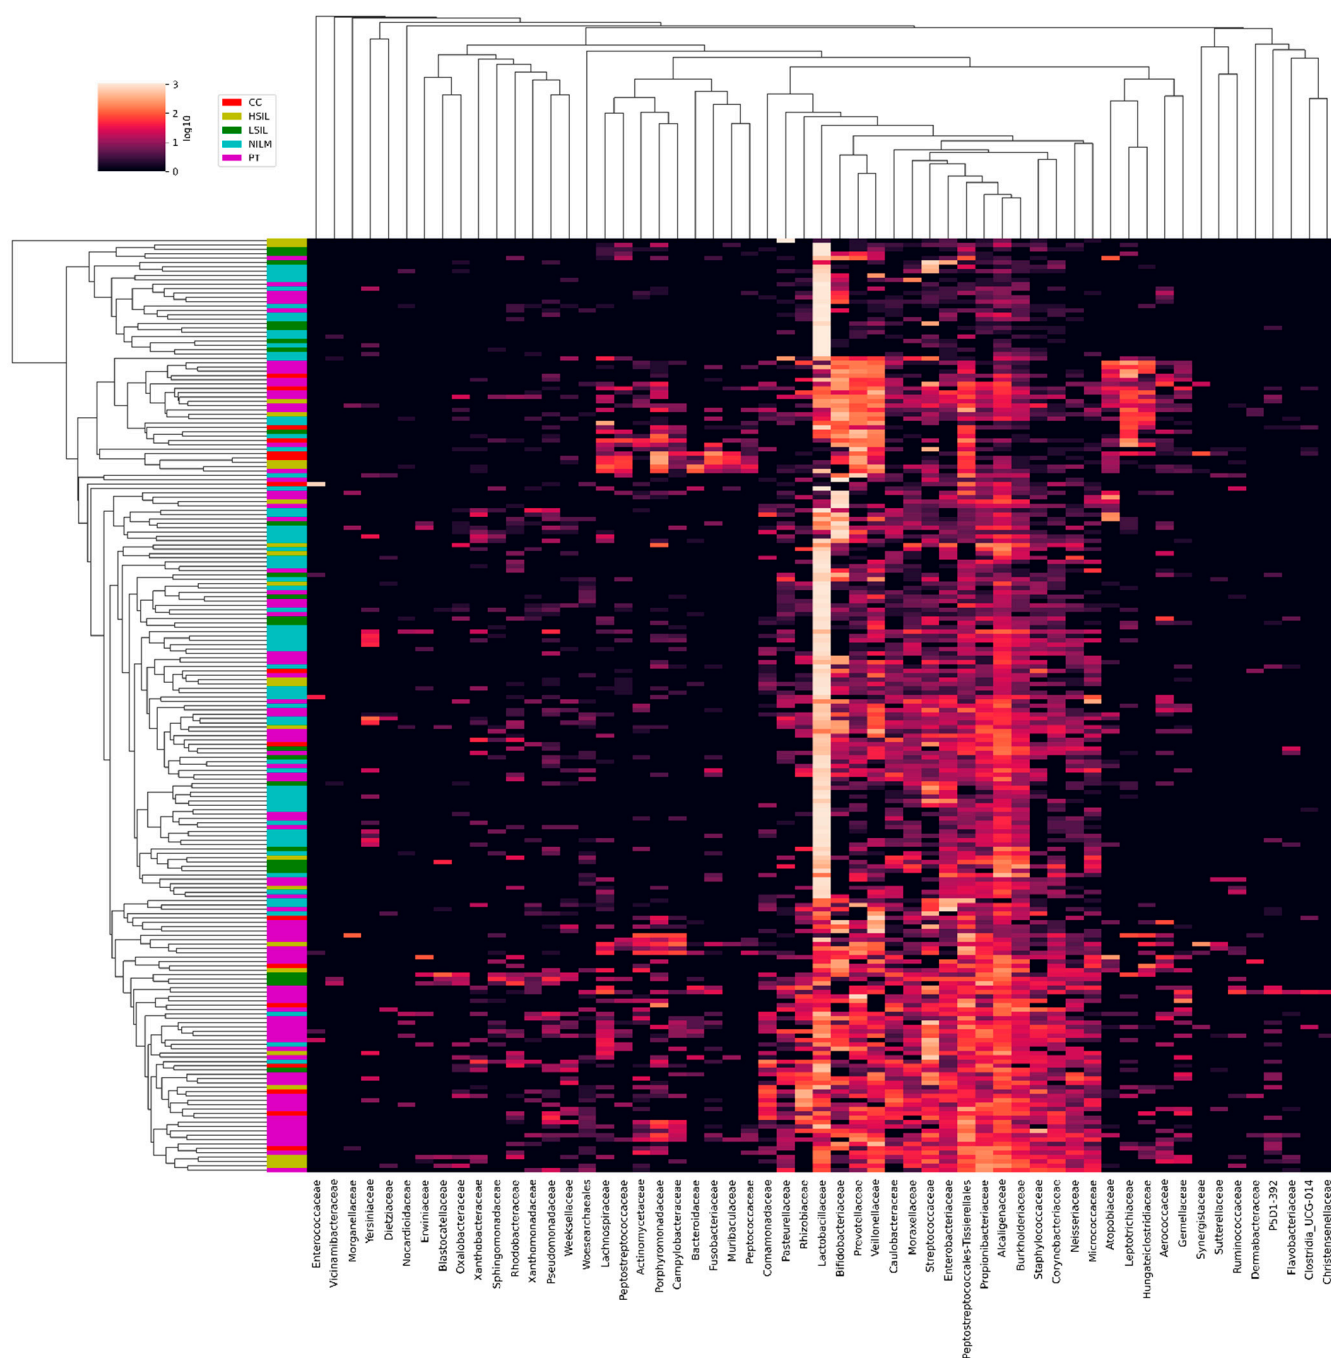

(a)

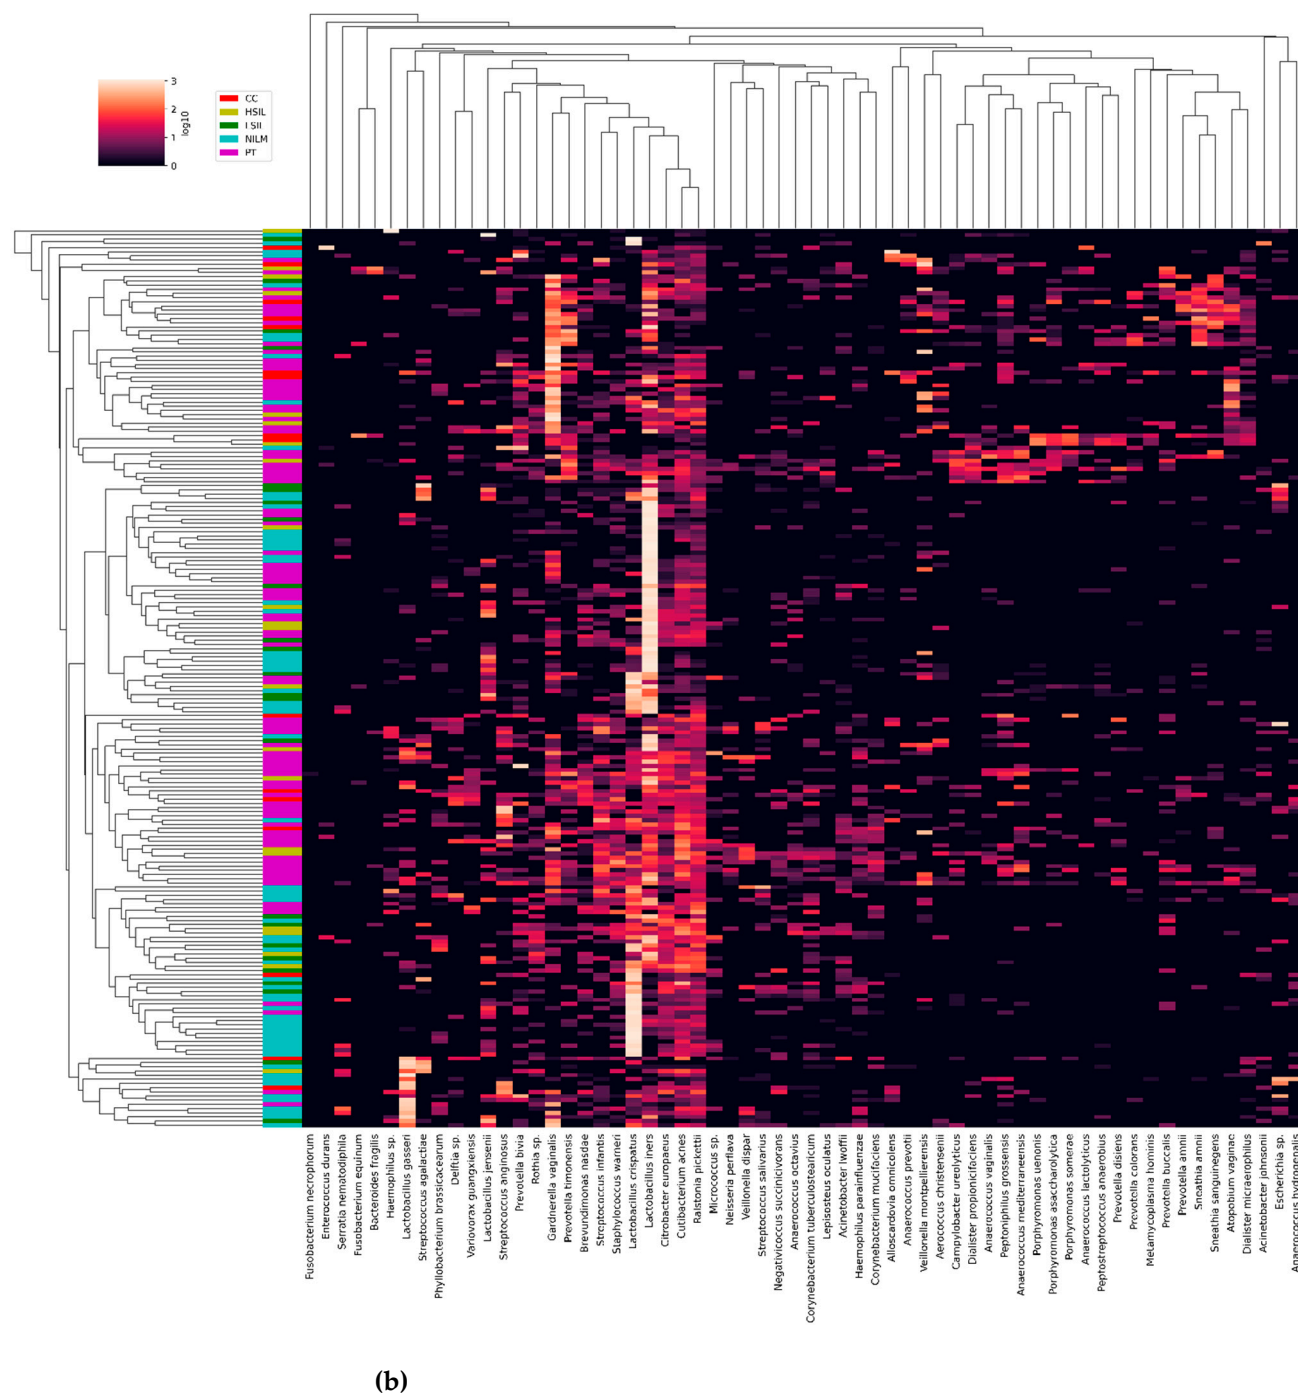

**Figure S1.** Community composition of cervical samples at the level of families (a) or species (b) as determined by massively parallel sequencing on the MiSeq platform. An unsupervised heatmap of the relative abundance of microbial taxa found in the cervicovaginal microbial communities of 234 patients: 72 NILMs (5 samples were excluded for technical reasons), 24 LSILs, 22 HSILs (2 samples were excluded for technical reasons), 15 CCs (1 sample was excluded for technical reasons), 101 PT samples, based on the Bray–Curtis dissimilarity metric. Diagnoses of patients are indicated by colors. (a) The families present in relative abundance of 1% in at least one sample are listed on the X axis. (b) Top 62 species (by abundance) are listed on the X axis. The cladograms at the top of the species' and families' names indicate the approximate evolutionary relationships between the species. LB species analysis by 16S metagenome sequencing. (a) The enrichment with lactobacilli (relative proportion of reads mapped to genomes of *Lactobacillus* spp.) at different diagnoses and post-treatment

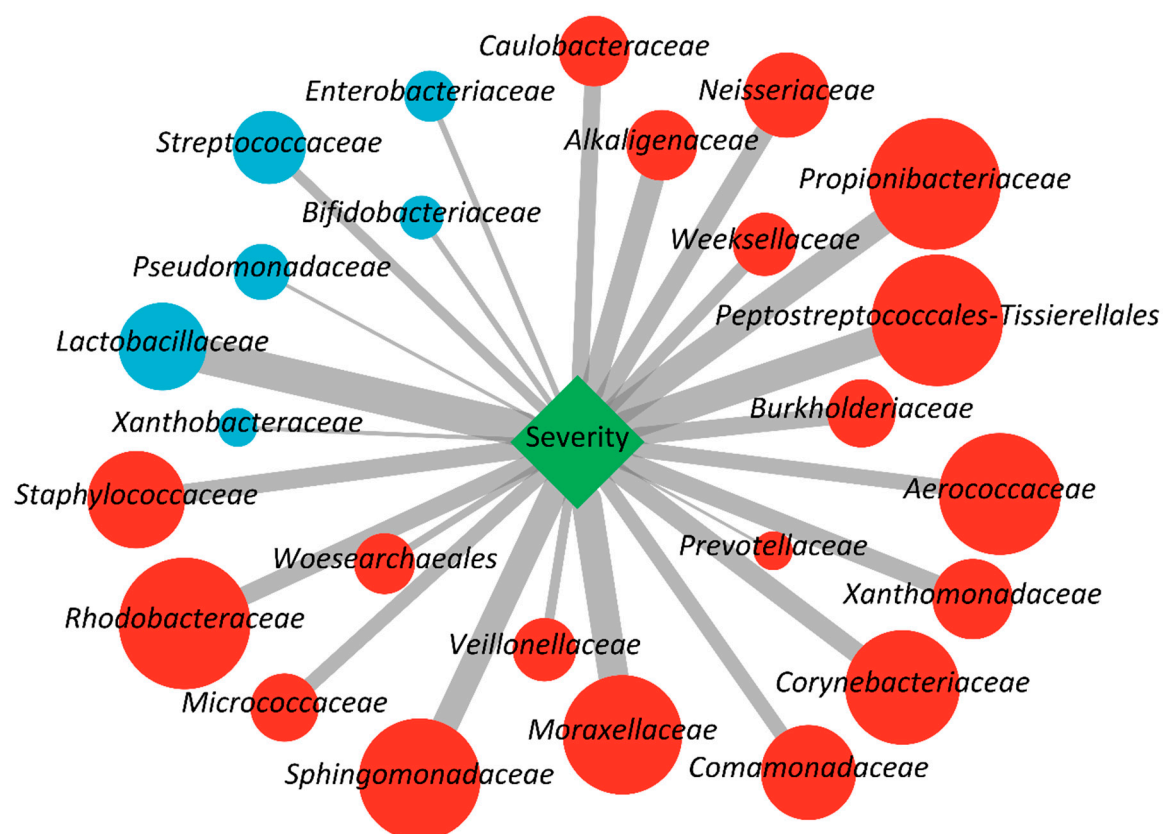

**Figure S2.** The correlation network between cervical lesion severity and microbiota at the family level. The nodes represent unique species, and the color of the nodes denotes an increase (red) or decrease (blue) in relative abundance when comparing patients with lesions and cancer and healthy controls. The size of the nodes shows the fold change values of the relative abundance in patients with high-grade lesions and cancer versus low-grade lesions healthy controls. The edges denote the correlation between the bacterial family and the lesion severity, the color of the edge represents a positive (red) or negative (blue) correlation, and the width denotes the strength of the correlation.

**Table S1.** Sequences of oligonucleotides used in the study. R6G: Rhodamine 6G (Rhodamine 590); ROX: Rhodamine X (carboxy-X-rhodamine); BHQ1: Black Hole Quencher-1; BHQ2: Black Hole Quencher-2; LNA: locked nucleic acid; R: reverse; F: forward.

| ID      | Type               | Sequence (5' → 3')                                                                   | Purpose                                   |
|---------|--------------------|--------------------------------------------------------------------------------------|-------------------------------------------|
| HMBS-R  | Forward PCR primer | GTGGCTACTGCTGATGTAGAA                                                                | Human HMBS gene amplification             |
| HMBS-R  | Reverse PCR primer | GGTCTCGAACTTGTGATCCT                                                                 | Human HMBS gene amplification             |
| HMBS-P  | TaqMan PCR probe   | (R6G)-TCACGCCTG(T-BHQ1)AATCCAGCACATTGGGA-p                                           | Human HMBS gene amplification             |
| BVcF2   | Forward PCR primer | AACAGGATTAGATACCCTGGTA                                                               | Pan-bacterial 16S rRNA gene amplification |
| BVcR2   | Reverse PCR primer | CATCTCAGACACGAGCT                                                                    | Pan-bacterial 16S rRNA gene amplification |
| BVpZ2   | TaqMan PCR probe   | (ROX)- GCTAAG (C-LNA)GAAAG (C-LNA)ATTAAGCATCCACCTG-BHQ2                              | Pan-bacterial 16S rRNA gene amplification |
| Fus342F | Forward PCR primer | ACACTCTTTCCTACACGACGCTCTCCGATCTCTACGGGA<br>GGCAGCAG                                  | 16S Library Preparation PCR Round 1       |
| Fus806R | Reverse PCR primer | GTGACTGGAGTTCAGACGTGTGCTCTCCGATCTGGACTA<br>CCGGGTATCT                                | 16S Library Preparation PCR Round 1       |
| P7i     | Indexed PCR primer | CAAGCAGAAGACGGCATACGAGAT-[Nextera-8nt-index]-<br>GTGACTGGAGTTCAGACGTGTGCTCTTCCGATC*T | 16S Library Preparation PCR Round 2       |
| P5i     | Indexed PCR primer | AATGATACGGCGACCACCGAGATCTACAC-[Nextera-8nt-index]-ACACTCTTCCCTACACGACGCTCTTCCGATC*T  | 16S Library Preparation PCR Round 2       |
| ilP-f   | Forward PCR primer | ATGATACGGCGACCACC                                                                    | Quantification of libraries               |
| ilP-r   | Reverse PCR primer | CAAGCAGAAGACGGCATAC                                                                  | Quantification of libraries               |
| ilP-p   | TaqMan PCR probe   | (ROX)-ACACTCTT[T-BHQ2]CCCTACACGACGCTCT-p                                             | Quantification of libraries               |

**Table S2.** P-values for pairwise comparisons of:

- a) CVM  $\alpha$ -diversity parameters at different diagnoses and post-treatment (see Figure 2); CRT, chemoradiotherapy; RT, radiotherapy; ST, surgical treatment; CT, combined RT and ST; PT, post-treatment group; PT+, patients undergoing surgery (as the main method or as part of combined regimens); PT-, patients without such an intervention;
- b) relative proportion of reads mapped to genomes of *Lactobacillus* spp. at different diagnoses and post-treatment, as determined by 16S rRNA gene sequencing (see Figure 3(a));
- c) relative abundance counts of *Peptococcales-Tissierellales*, *Bifidobacteriaceae*, *Veillonellaceae*, and *Sphingomonadaceae* at different diagnoses and post-treatment, as determined by 16S rRNA gene sequencing (see Figure 4a);
- d) relative abundance counts of *Propionibacteriaceae*, *Alcaligenaceae*, *Burkholderiaceae*, and *Moraxellaceae* at different diagnoses and post-treatment, as determined by 16S rRNA gene sequencing (see Figure 4b);
- e) relative abundance counts of *Cutibacterium acnes* at different diagnoses and post-treatment, as determined by 16S rRNA gene sequencing (see Figure 4d);
- f) enrichment with *Lactobacillus iners*, non-*iners* lactobacilli, *Gardnerella vaginalis*, and *Prevotella* species at different diagnoses and in post-treatment subgroups, as determined by 16S rRNA gene sequencing (see Figure 5d).
- g) relative abundance of lactobacilli, common bacterial-vaginosis-associated anaerobes (*Gardnerella vaginalis*, *Atopobium vaginae*, *Prevotella* spp., and the *Leptotrichia amnionii* group summarized) and common aerobic-vaginitis-associated aerobes (*Streptococcus* spp., *Staphylococcus* spp., and *Enterococcus* spp. summarized) as assessed by the BioFlor kit at different diagnoses and in different post-treatment subgroups (see Figure 6c).

a)

|                                     |                     |          |
|-------------------------------------|---------------------|----------|
| <b>Faith phylogenetic diversity</b> | <b>NILM vs HSIL</b> | 0.012722 |
|                                     | <b>NILM vs CC</b>   | 0.000344 |
|                                     | <b>NILM vs PT-</b>  | 4.78E-07 |
| <b>OTUs</b>                         | <b>NILM vs HSIL</b> | 0.017173 |
|                                     | <b>NILM vs CC</b>   | 7.44E-05 |
|                                     | <b>NILM vs PT-</b>  | 7.6E-08  |
| <b>Shannon index</b>                | <b>NILM vs HSIL</b> | 0.000631 |
|                                     | <b>NILM vs CC</b>   | 8.79E-09 |
|                                     | <b>NILM vs PT-</b>  | 2.4E-07  |

b)

|                     |          |
|---------------------|----------|
| <b>NILM vs HSIL</b> | 0.002897 |
| <b>NILM vs CC</b>   | 0.000001 |
| <b>NILM vs PT</b>   | 0.000000 |
| <b>LSIL vs CC</b>   | 0.000315 |
| <b>LSIL vs PT</b>   | 0.004110 |
| <b>HSIL vs CC</b>   | 0.032764 |
| <b>CC vs PT</b>     | 0.013019 |

c)

| Family                                     | NILM vs CC | LSIL vs PT | LSIL vs CC  |
|--------------------------------------------|------------|------------|-------------|
| <i>Peptostreptococcales-Tissierellales</i> | 8.78E-06   | 0.00465    | 0.013925472 |
| <i>Bifidobacteriaceae</i>                  | >0.05      | 0.030166   | >0.05       |
| <i>Veillonellaceae</i>                     | >0.05      | >0.05      | >0.05       |
| <i>Sphingomonadaceae</i>                   | 0.000718   | 0.000769   | >0.05       |

d)

| Family                     | NILM vs CC | HSIL vs PT | CC vs PT    |
|----------------------------|------------|------------|-------------|
| <i>Protonibacteriaceae</i> | 0.0014069  | >0.05      | 0.038993246 |
| <i>Alkaligenaceae</i>      | 0.0006585  | 0.017628   | 0.000497009 |
| <i>Burkholderiaceae</i>    | >0.05      | >0.05      | >0.05       |
| <i>Moraxellaceae</i>       | 9.512E-05  | >0.05      | 6.26604E-06 |

e)

|                   |           |
|-------------------|-----------|
| <b>NILM vs CC</b> | 0.0003317 |
| <b>CC vs ST</b>   | 0.0409828 |
| <b>CC vs CT</b>   | 0.020345  |

f)

|                                     |                   |        |       |
|-------------------------------------|-------------------|--------|-------|
|                                     | <b>NILM vs CC</b> | 0.0004 | (***) |
|                                     | <b>NILM vs RT</b> | 0.0000 | (***) |
| <i>Lactobacillus spp. non-iners</i> | <b>LSIL vs RT</b> | 0.0280 | (*)   |
|                                     | <b>LSIL vs CC</b> | 0.0395 | (*)   |
|                                     | <b>CC vs RT</b>   | 0.0061 | (**)  |
|                                     | <b>CC vs ST</b>   | 0.0358 | (*)   |
| <i>Lactobacillus iners</i>          | <b>CC vs CT</b>   | 0.0313 | (*)   |

g)

|                      | <b>NILM vs</b> |             |            |           |             |           |
|----------------------|----------------|-------------|------------|-----------|-------------|-----------|
|                      | <b>HSIL</b>    | <b>CC</b>   | <b>CRT</b> | <b>RT</b> | <b>ST</b>   | <b>CT</b> |
| <i>Lactobacillus</i> | 0.046043842    | 1.59E-05    | 3.21E-05   | 1.1E-08   | >0.05       | >0.05     |
| Anaerobes            | 0.043838567    | 0.008897    | 0.000202   | 4.19E-09  | 0.000726131 | 0.036949  |
| Aerobes              | >0.05          | >0.05       | 0.004397   | 0.000112  | >0.05       | >0.05     |
|                      | <b>LSIL vs</b> |             |            |           |             |           |
|                      | <b>HSIL</b>    | <b>CC</b>   | <b>CRT</b> | <b>RT</b> | <b>ST</b>   | <b>CT</b> |
| <i>Lactobacillus</i> | >0.05          | 0.007181486 | >0.05      | 0.006903  | >0.05       | >0.05     |
| Anaerobes            | >0.05          | >0.05       | >0.05      | >0.05     | >0.05       | >0.05     |
| Aerobes              | >0.05          | >0.05       | >0.05      | >0.05     | >0.05       | >0.05     |
